# Supplementary material
Source: PubMed Central journal article supplement (PMC3457499)
Supplement: AEM.01458-12_zam999103692so1.pdf [file AEM.01458-12_zam999103692so1.pdf]

|                               |                                                                                                 |           |                                            |                               |                          |
|-------------------------------|-------------------------------------------------------------------------------------------------|-----------|--------------------------------------------|-------------------------------|--------------------------|
| gi 15965789 ref NP_386142.1   | putative toxin secretion transmembrane protein                                                  | SMc04208  | Most likely cleavage site: 1 - 43 [AGA-VV] | Tat signal peptide predicted. | Reliability score: 0.989 |
| gi 1595970155 ref NP_386154.2 | hypothetical protein                                                                            | SMc04289  | Most likely cleavage site: 1 - 35 [VRA-QG] | Tat signal peptide predicted. | Reliability score: 1.000 |
| gi 15965868 ref NP_386221.1   | hypothetical protein                                                                            | SMc01432  |                                            | No signal peptide predicted.  | Reliability score: 0.20  |
| gi 15965895 ref NP_386248.1   | hypothetical protein                                                                            | SMc01459  |                                            | Tat signal peptide predicted. | Reliability score: 0.994 |
| gi 15965942 ref NP_386295.1   | hypothetical protein                                                                            | SMc01853  | Most likely cleavage site: 1 - 44 [ALA-AG] | No signal peptide predicted.  | Reliability score: 0.316 |
| gi 15965993 ref NP_386346.1   | putative periplasmic binding ABC transporter protein                                            | SMc01628  | Most likely cleavage site: 1 - 49 [ALA-AD] | Tat signal peptide predicted. | Reliability score: 1.000 |
| gi 15965997 ref NP_386350.1   | putative periplasmic binding ABC transporter protein                                            | SMc01632  | Most likely cleavage site: 1 - 59 [AYA-AG] | Tat signal peptide predicted. | Reliability score: 0.996 |
| gi 1595970151 ref NP_386360.2 | putative periplasmic binding protein                                                            | SMc01642  | Most likely cleavage site: 1 - 46 [AAA-QE] | Tat signal peptide predicted. | Reliability score: 0.997 |
| gi 15966012 ref NP_386365.1   | putative periplasmic binding protein                                                            | SMc01647  | Most likely cleavage site: 1 - 46 [ARA-QE] | Tat signal peptide predicted. | Reliability score: 1.000 |
| gi 15966169 ref NP_386522.1   | hypothetical protein                                                                            | SMc01522  | Most likely cleavage site: 1 - 42 [SQA-AG] | Tat signal peptide predicted. | Reliability score: 0.988 |
| gi 15966231 ref NP_386584.1   | putative haloperoxidase protein                                                                 | SMc01944  | Most likely cleavage site: 1 - 51 [AGA-AT] | Tat signal peptide predicted. | Reliability score: 0.977 |
| gi 15966253 ref NP_386606.1   | spermidine/putrescine ABC transporter periplasmic protein                                       | SMc01966  | Most likely cleavage site: 1 - 30 [LRA-QD] | Tat signal peptide predicted. | Reliability score: 0.997 |
| gi 15966286 ref NP_386639.1   | putative periplasmic binding ABC transporter protein                                            | SMc02021  | Most likely cleavage site: 1 - 44 [ALA-TG] | Tat signal peptide predicted. | Reliability score: 0.996 |
| gi 15966325 ref NP_386678.1   | putative periplasmic binding protein                                                            | SMc02344  | Most likely cleavage site: 1 - 33 [ASA-GE] | Tat signal peptide predicted. | Reliability score: 0.977 |
| gi 15966387 ref NP_386740.1   | hypothetical protein                                                                            | SMc00738  | Most likely cleavage site: 1 - 31 [ALG-FE] | Tat signal peptide predicted. | Reliability score: 0.982 |
| gi 15966410 ref NP_386763.1   | hypothetical protein                                                                            | SMc00715  |                                            | TM segment predicted 22-44    | Reliability score: 0.775 |
| gi 15966492 ref NP_386845.1   | translocation protein TolB                                                                      | SMc04461  | Most likely cleavage site: 1 - 28 [ANA-LV] | Tat signal peptide predicted. | Reliability score: 0.960 |
| gi 15966501 ref NP_386854.1   | hypothetical protein                                                                            | SMc03964  | Most likely cleavage site: 1 - 27 [AFG-IE] | Tat signal peptide predicted. | Reliability score: 0.993 |
| gi 15966561 ref NP_386914.1   | putative membrane-bound lytic murein transglycosylase protein                                   | SMc04024  | Most likely cleavage site: 1 - 29 [ARA-DQ] | Tat signal peptide predicted. | Reliability score: 0.812 |
| gi 15966585 ref NP_386938.1   | putative sulfite oxidase protein                                                                | SMc04049  | Most likely cleavage site: 1 - 31 [AEA-KE] | Tat signal peptide predicted. | Reliability score: 1.000 |
| gi 15966680 ref NP_387033.1   | molybdate ABC transporter periplasmic molybdate-binding protein                                 | SMc03196  | Most likely cleavage site: 1 - 29 [AQA-AE] | Tat signal peptide predicted. | Reliability score: 0.998 |
| gi 15966722 ref NP_387075.1   | putative periplasmic binding ABC transporter protein                                            | SMc03124  | Most likely cleavage site: 1 - 28 [AFS-QG] | Tat signal peptide predicted. | Reliability score: 0.999 |
| gi 15966844 ref NP_387197.1   | putative alkaline phosphatase transmembrane protein                                             | SMc03243  | Most likely cleavage site: 1 - 34 [FYA-RG] | Tat signal peptide predicted. | Reliability score: 0.981 |
| gi 15966861 ref NP_387214.1   | putative antikinase protein                                                                     | SMc03254  | Most likely cleavage site: 1 - 23 [AFA-LD] | Tat signal peptide predicted. | Reliability score: 0.893 |
| gi 15966886 ref NP_387239.1   | putative oxidoreductase protein                                                                 | SMc03287  | Most likely cleavage site: 1 - 29 [ARA-QA] | Tat signal peptide predicted. | Reliability score: 0.997 |
| gi 15966945 ref NP_387298.1   | hypothetical protein                                                                            | SMc03809  | Most likely cleavage site: 1 - 42 [AQA-SA] | Tat signal peptide predicted. | Reliability score: 0.989 |
| gi 15966988 ref NP_387341.1   | hypothetical protein                                                                            | SMc03852  | Most likely cleavage site: 1 - 32 [VLV-QH] | Tat signal peptide predicted. | Reliability score: 0.878 |
| gi 16263875 ref NP_436667.1   | hypothetical protein                                                                            | SM_b20127 | Most likely cleavage site: 1 - 25 [AFA-EG] | Tat signal peptide predicted. | Reliability score: 0.987 |
| gi 16263957 ref NP_436749.1   | putative epoxide hydrolase protein                                                              | SM_b20216 | Most likely cleavage site: 1 - 53 [SFA-AI] | Tat signal peptide predicted. | Reliability score: 0.881 |
| gi 16263961 ref NP_436753.1   | putative epoxide hydrolase protein                                                              | SM_b20221 | Most likely cleavage site: 1 - 46 [AQA-GT] | Tat signal peptide predicted. | Reliability score: 0.997 |
| gi 16263970 ref NP_436762.1   | putative ABC transporter sugar-binding protein                                                  | SM_b20231 | Most likely cleavage site: 1 - 43 [VRA-QE] | Tat signal peptide predicted. | Reliability score: 0.999 |
| gi 16264022 ref NP_436814.1   | putative ABC transporter periplasmic spermidine putrescine-binding protein                      | SM_b20284 | Most likely cleavage site: 1 - 33 [AFS-QS] | Tat signal peptide predicted. | Reliability score: 0.955 |
| gi 16264054 ref NP_436846.1   | TRAP-type large permease component                                                              | SM_b20320 | Most likely cleavage site: 1 - 28 [VRA-QE] | Tat signal peptide predicted. | Reliability score: 1.000 |
| gi 16264065 ref NP_436857.1   | hypothetical protein                                                                            | SM_b20331 | Most likely cleavage site: 1 - 36 [AEA-AP] | Sec signal peptide predicted  | Reliability score: 0.959 |
| gi 16264076 ref NP_436868.1   | putative isoquinoline 1-oxidoreductase                                                          | SM_b20342 | Most likely cleavage site: 1 - 48 [ALA-GE] | Tat signal peptide predicted. | Reliability score: 0.998 |
| gi 16264117 ref NP_436909.1   | putative ABC transporter periplasmic solute-binding protein                                     | SM_b20383 | Most likely cleavage site: 1 - 38 [ASA-EE] | Tat signal peptide predicted. | Reliability score: 1.000 |
| gi 16264138 ref NP_436930.1   | putative aldehyde dehydrogenase protein                                                         | SM_b20404 | Most likely cleavage site: 1 - 31 [AFA-QE] | Tat signal peptide predicted. | Reliability score: 1.001 |
| gi 16264191 ref NP_436983.1   | hypothetical protein                                                                            | SM_b20461 | Most likely cleavage site: 1 - 40 [ASA-EV] | Tat signal peptide predicted. | Reliability score: 0.781 |
| gi 16264243 ref NP_437035.1   | putative protein-glutamate methyltransferase protein                                            | SM_b20514 | Most likely cleavage site: 1 - 84 [FAA-AV] | Tat signal peptide predicted. | Reliability score: 0.890 |
| gi 16264265 ref NP_437057.1   | putative solute-binding protein                                                                 | SM_b20538 | Most likely cleavage site: 1 - 28 [ALA-AE] | Tat signal peptide predicted. | Reliability score: 1.000 |
| gi 16264420 ref NP_437212.1   | putative transcriptional regulator                                                              | SM_b21093 | Most likely cleavage site: 1 - 30 [AAA-ES] | Tat signal peptide predicted. | Reliability score: 0.965 |
| gi 16264513 ref NP_437305.1   | putative mureinpeptideoligopeptide ABC transporter periplasmic solute-binding protein precursor | SM_b21261 | Most likely cleavage site: 1 - 31 [ALA-TL] | Tat signal peptide predicted. | Reliability score: 0.978 |
| gi 16264540 ref NP_437332.1   | xanthine dehydrogenase protein                                                                  | SM_b21288 | Most likely cleavage site: 1 - 28 [ASA-AG] | Tat signal peptide predicted. | Reliability score: 0.953 |
| gi 16264630 ref NP_437422.1   | putative dipeptide uptake ABC transporter periplasmic solute-binding protein precursor          | SM_b21215 | Most likely cleavage site: 1 - 52 [ARA-SG] | Tat signal peptide predicted. | Reliability score: 0.999 |
| gi 16264653 ref NP_437445.1   | hypothetical protein                                                                            | SM_b21329 | Most likely cleavage site: 1 - 34 [AIA-AV] | Tat signal peptide predicted. | Reliability score: 0.936 |
| gi 16264661 ref NP_437453.1   | iron-sulfur-binding protein                                                                     | SM_b21337 | Most likely cleavage site: 1 - 43 [AVA-AP] | Tat signal peptide predicted. | Reliability score: 0.994 |
| gi 16264669 ref NP_437461.1   | putative sugar uptake ABC transporter periplasmic solute-binding protein precursor              | SM_b21345 | Most likely cleavage site: 1 - 28 [AFA-EL] | Tat signal peptide predicted. | Reliability score: 0.999 |
| gi 16264672 ref NP_437464.1   | putative 2-deoxy-D-gluconate 3-dehydrogenase protein                                            | SM_b21348 | Most likely cleavage site: 1 - 34 [ARA-GG] | Tat signal peptide predicted. | Reliability score: 0.979 |
| gi 16264706 ref NP_437498.1   | catechol 1, 2-dioxygenase                                                                       | SM_b21380 | Most likely cleavage site: 1 - 30 [VWA-QL] | Tat signal peptide predicted. | Reliability score: 0.985 |
| gi 16264709 ref NP_437501.1   | SDR family dehydrogenase protein                                                                | SM_b21383 | Most likely cleavage site: 1 - 39 [AQA-QS] | Tat signal peptide predicted. | Reliability score: 0.987 |
| gi 16264733 ref NP_437525.1   | hypothetical protein                                                                            | SM_b21544 | Most likely cleavage site: 1 - 28 [VAA-QS] | Tat signal peptide predicted. | Reliability score: 0.996 |
| gi 16264746 ref NP_437538.1   | putative aldehyde or xanthine dehydrogenase iron-sulfur subunit protein                         | SM_b21558 | Most likely cleavage site: 1 - 41 [AAA-DS] | Tat signal peptide predicted. | Reliability score: 0.990 |
| gi 16264829 ref NP_437621.1   | putative glucosyltransferase protein                                                            | SM_b20956 |                                            | No signal peptide predicted   | Reliability score: 0.173 |
| gi 16264923 ref NP_437715.1   | hypothetical protein                                                                            | SM_b20881 | Most likely cleavage site: 1 - 26 [AFA-AG] | Tat signal peptide predicted. | Reliability score: 1.000 |
| gi 16264956 ref NP_437748.1   | hypothetical protein                                                                            | SM_b20910 | Most likely cleavage site: 1 - 48 [AIA-KS] | Tat signal peptide predicted. | Reliability score: 0.998 |
| gi 16264962 ref NP_437754.1   | putative arylsulfatase protein                                                                  | SM_b20915 | Most likely cleavage site: 1 - 46 [AQA-AS] | Tat signal peptide predicted. | Reliability score: 0.997 |
| gi 16265069 ref NP_437861.1   | hypothetical protein                                                                            | SM_b21492 | Most likely cleavage site: 1 - 42 [AAA-RA] | Sec signal peptide predicted. | Reliability score: 0.965 |
| gi 16265094 ref NP_437886.1   | hypothetical protein                                                                            | SM_b21516 | Most likely cleavage site: 1 - 35 [AER-AP] | Tat signal peptide predicted. | Reliability score: 0.983 |
| gi 16265099 ref NP_437891.1   | hypothetical protein                                                                            | SM_b21521 | Most likely cleavage site: 1 - 30 [ALS-GS] | Tat signal peptide predicted. | Reliability score: 0.925 |
| gi 16265115 ref NP_437907.1   | putative sugar uptake ABC transporter periplasmic solute-binding protein precursor              | SM_b20660 | Most likely cleavage site: 1 - 30 [AQA-EP] | Tat signal peptide predicted. | Reliability score: 0.996 |
| gi 16265126 ref NP_437918.1   | putative sugar uptake ABC transporter periplasmic solute-binding protein precursor              | SM_b20671 | Most likely cleavage site: 1 - 30 [ALA-QD] | Tat signal peptide predicted. | Reliability score: 0.998 |
| gi 16265216 ref NP_438008.1   | putative adenylate cyclase protein                                                              | SM_b20776 | Most likely cleavage site: 1 - 43 [LRA-YD] | Tat signal peptide predicted. | Reliability score: 0.622 |
| gi 16265268 ref NP_438060.1   | putative transcriptional regulator ArsR family protein                                          | SM_b20608 | Most likely cleavage site: 1 - 34 [ELA-AP] | Tat signal peptide predicted. | Reliability score: 0.807 |
| gi 16265272 ref NP_438064.1   | C4-dicarboxylate transport sensor protein                                                       | SM_b20612 | Most likely cleavage site: 1 - 55 [ALA-GL] | Tat signal peptide predicted. | Reliability score: 0.961 |
| gi 16265274 ref NP_438066.1   | hypothetical protein                                                                            | SM_b20614 | Most likely cleavage site: 1 - 44 [GMA-GY] | Tat signal peptide predicted. | Reliability score: 0.839 |
| gi 16265280 ref NP_438072.1   | putative sugar uptake ABC transporter periplasmic solute-binding protein precursor              | SM_b20620 | Most likely cleavage site: 1 - 27 [SLA-AD] | Tat signal peptide predicted. | Reliability score: 0.975 |

The 145 proteins predicted to contain twin arginine leaders were downloaded (<http://www.compgen.org/tools/PRED-TAT/supplement/genomes>) and reanalyzed using TAT-PRED. The results are tabulated such that, systematic identifiers, locus tags, most likely cleavage sites, and reliability scores are presented. Coloured fonts were used to denote proteins that were not bonafide predictions. Font colours are used as follows; Green, No signal peptide; Red, sec signal peptide; Blue, Transmembrane segment.

**Table S2. Bacterial Strains and Plasmids**

| Strain or plasmid                   | Relevant characteristics*                                                                                                                                                                                   | Reference or source |
|-------------------------------------|-------------------------------------------------------------------------------------------------------------------------------------------------------------------------------------------------------------|---------------------|
| Strains                             |                                                                                                                                                                                                             |                     |
| <i>S. meliloti</i>                  |                                                                                                                                                                                                             |                     |
| Rm1021                              | SU47 <i>str-21</i> , Sm <sup>r</sup>                                                                                                                                                                        | (4)                 |
| SRmA691                             | Rm1021, $\Delta$ <i>SMa1236</i>                                                                                                                                                                             | This work           |
| SRmA693                             | Rm1021, $\Delta$ <i>SMb20660</i>                                                                                                                                                                            | This work           |
| SRmA703                             | Rm1021, $\Delta$ <i>SMb21337</i>                                                                                                                                                                            | This work           |
| SRmA709                             | Rm1021, $\Delta$ <i>SMc01724</i>                                                                                                                                                                            | This work           |
| SRmA720                             | Rm1021, $\Delta$ <i>SMa2125</i>                                                                                                                                                                             | This work           |
| SRmA722                             | Rm1021, $\Delta$ <i>SMa1507</i>                                                                                                                                                                             | This work           |
| SRmA725                             | Rm1021, $\Delta$ <i>SMa1038</i>                                                                                                                                                                             | This work           |
| SRmA729                             | Rm1021, $\Delta$ <i>SMc03063</i>                                                                                                                                                                            | This work           |
| SRmA730                             | Rm1021, $\Delta$ <i>SMc04137</i>                                                                                                                                                                            | This work           |
| SRmA731                             | Rm1021, $\Delta$ <i>SMc01632</i>                                                                                                                                                                            | This work           |
| SRmA821                             | Rm1021, $\Delta$ <i>SMa2129</i>                                                                                                                                                                             | This work           |
| SRmA823                             | Rm1021, $\Delta$ <i>SMb20383</i>                                                                                                                                                                            | This work           |
| SRmA862                             | Rm1021, $\Delta$ <i>SMb20231</i>                                                                                                                                                                            | This work           |
| SRmA961                             | Rm1021, $\Delta$ <i>SMa1641</i>                                                                                                                                                                             | This work           |
| SRmD212                             | Rm1021, $\Delta$ <i>SMb20404</i>                                                                                                                                                                            | This work           |
| SRmD214                             | Rm1021, $\Delta$ <i>SMb20671</i>                                                                                                                                                                            | This work           |
| SRmD216                             | Rm1021, $\Delta$ <i>SMb21558</i>                                                                                                                                                                            | This work           |
| SRmD218                             | Rm1021, $\Delta$ <i>SMc04218</i>                                                                                                                                                                            | This work           |
| SRmD220                             | Rm1021, $\Delta$ <i>SMc00577</i>                                                                                                                                                                            | This work           |
| SRmD222                             | Rm1021, $\Delta$ <i>SMc04167</i>                                                                                                                                                                            | This work           |
| SRmD224                             | Rm1021, $\Delta$ <i>SMc00817</i>                                                                                                                                                                            | This work           |
| SRmD226                             | Rm1021, $\Delta$ <i>SMc04049</i>                                                                                                                                                                            | This work           |
| SRmD228                             | Rm1021, $\Delta$ <i>SMc02021</i>                                                                                                                                                                            | This work           |
| SRmD230                             | Rm1021, $\Delta$ <i>SMb21380</i>                                                                                                                                                                            | This work           |
| SRmD232                             | Rm1021, $\Delta$ <i>SMc00187</i>                                                                                                                                                                            | This work           |
| SRmD234                             | Rm1021, $\Delta$ <i>SMa0943</i>                                                                                                                                                                             | This work           |
| SRmD236                             | Rm1021, $\Delta$ <i>SMa1182</i>                                                                                                                                                                             | This work           |
| SRmD238                             | Rm1021, $\Delta$ <i>SMa1819</i>                                                                                                                                                                             | This work           |
| SRmD240                             | Rm1021, $\Delta$ <i>SMa2157</i>                                                                                                                                                                             | This work           |
| SRmD242                             | Rm1021, $\Delta$ <i>SMb20342</i>                                                                                                                                                                            | This work           |
| <i>E. coli</i>                      |                                                                                                                                                                                                             |                     |
| DB3.1                               | F <sup>-</sup> <i>gyrA462 endA1</i> $\Delta$ ( <i>sr1-recA</i> ) <i>mcrB mrr hsdS20</i> ( $\tau_{B^-}$ $m_{B^-}$ ) <i>supE44 ara-14 galK2 lacY1 proA2 rpsL20</i> (Sm <sup>r</sup> ) <i>xyl-5 Aleu mtl-1</i> | (3)                 |
| DB3.1 $\lambda$ <i>pir</i>          | $\lambda$ <i>pir</i> lysogen of DB3.1                                                                                                                                                                       | (3)                 |
| DH5 $\alpha$ R $\lambda$ <i>pir</i> | Rif <sup>r</sup> derivative of DH5 $\alpha$ $\lambda$ <i>pir</i>                                                                                                                                            | (3)                 |
| DH5 $\alpha$                        | $\lambda$ $\Phi$ 80d <i>lacZ</i> <sup>o</sup> M15 <sup>o</sup> ( <i>lacZYA-argF</i> )U169 <i>recA1 endA1 hsdR17</i> ( $\tau_{K^-}$ $m_{K^-}$ ) <i>supE44 thi-1 gyrA relA1</i>                               | (2)                 |

|           |                                                                                      |           |
|-----------|--------------------------------------------------------------------------------------|-----------|
| DH5α λpir | λpir lysogen of DH5α                                                                 | (3)       |
| HMS17-1   | Rif <sup>r</sup> derivative of S17-1                                                 | (3)       |
| S17-1     | <i>recA</i> derivative of MM294A with integrated RP4-2 (Tc::Mu::Kan::Tn7)            | (5)       |
| MM294A    | <i>pro-82 thi-1 hsdR17 supE44</i>                                                    | (1)       |
| MT607     | MM294A <i>recA56</i>                                                                 | (1)       |
| MT616     | MT607(pRK600)                                                                        | (1)       |
| Plasmids  |                                                                                      |           |
| pRK600    | pRK2013 <i>npt::Tn9</i> , Cm <sup>r</sup>                                            | (1)       |
| pBH474    | Suc <sup>s</sup> derivative of pTH474                                                | (3)       |
| pMK2016   | Sp <sup>c</sup> Sm <sup>r</sup> <i>oriV oriTColE1</i> with FRT cassette from pMK2014 | (3)       |
| pMK2017   | Tet <sup>r</sup> <i>oriV R6K oriTRP4</i> with FRT cassette from pMK2015              | (3)       |
| pXINT129  | Kan <sup>r</sup> ; λ <i>int</i> and <i>xis</i> driven by P <sub>lac</sub>            | (3)       |
| pBP152    | <i>SMa1041</i> in pMK2017 destination vector                                         | This work |
| pBP153    | <i>SMa1183</i> in pMK2017 destination vector                                         | This work |
| pBP154    | <i>SMc04048</i> in pMK2017 destination vector                                        | This work |
| pBP156    | <i>SMa2153</i> in pMK2017 destination vector                                         | This work |
| pBP157    | <i>SMb20670</i> in pMK2017 destination vector                                        | This work |
| pBP158    | <i>SMc00578</i> in pMK2017 destination vector                                        | This work |
| pBP161    | <i>SMc04217</i> in pMK2017 destination vector                                        | This work |
| pBP163    | <i>SMc00186</i> in pMK2017 destination vector                                        | This work |
| pBP164    | <i>SMc02020</i> in pMK2017 destination vector                                        | This work |
| pBP165    | <i>SMa945</i> in pMK2017 destination vector                                          | This work |
| pBP166    | <i>SMc01724</i> in pMK2017 destination vector                                        | This work |
| pBP167    | <i>SMc00818</i> in pMK2017 destination vector                                        | This work |
| pBP168    | <i>SMc01633</i> in pMK2017 destination vector                                        | This work |
| pBP169    | <i>SMb20341</i> in pMK2017 destination vector                                        | This work |
| pBP170    | <i>SMb20405</i> in pMK2017 destination vector                                        | This work |
| pBP171    | <i>SMb21559</i> in pMK2017 destination vector                                        | This work |
| pBP193    | <i>SMa2159</i> in pMK2016 destination vector                                         | This work |
| pBP197    | <i>SMc01631</i> in pMK2016 destination vector                                        | This work |
| pBP199    | <i>SMc00576</i> in pMK2016 destination vector                                        | This work |
| pBP201    | <i>SMb21380</i> in pMK2017 destination vector                                        | This work |
| pBP203    | <i>SMa1820</i> in pMK2017 destination vector                                         | This work |
| pBP204    | <i>SMc04168</i> in pMK2017 destination vector                                        | This work |
| pBP205    | <i>SMc01723</i> in pMK2016 destination vector                                        | This work |
| pBP213    | <i>SMa941</i> in pMK2016 destination vector                                          | This work |
| pBP216    | <i>SMb20434</i> in pMK2016 destination vector                                        | This work |
| pBP218    | <i>SMb21557</i> in pMK2016 destination vector                                        | This work |
| pBP219    | <i>SMb20672</i> in pMK2016 destination vector                                        | This work |
| pBP220    | <i>SMc04050</i> in pMK2016 destination vector                                        | This work |
| pBP221    | <i>SMa816</i> in pMK2016 destination vector                                          | This work |
| pBP223    | <i>SMb20403</i> in pMK2016 destination vector                                        | This work |
| pBP226    | <i>SMc04166</i> in pMK2016 destination vector                                        | This work |
| pBP229    | <i>SMb21381</i> in pMK2016 destination vector                                        | This work |
| pBP231    | <i>SMc00188</i> in pMK2016 destination vector                                        | This work |
| pBP234    | <i>SMa1817</i> in pMK2016 destination vector                                         | This work |
| pBP236    | <i>SMc04219</i> in pMK2016 destination vector                                        | This work |
| pBP238    | <i>SMc02022</i> in pMK2016 destination vector                                        | This work |

|        |                                               |           |
|--------|-----------------------------------------------|-----------|
| pBP240 | <i>SMa1179</i> in pMK2016 destination vector  | This work |
| pBP258 | <i>SMa2131</i> in pMK2017 destination vector  | This work |
| pBP259 | <i>SMa2127</i> in pMK2016 destination vector  | This work |
| pBP260 | <i>SMa1639</i> in pMK2016 destination vector  | This work |
| pBP261 | <i>SMa1643</i> in pMK2017 destination vector  | This work |
| pHY1   | <i>SMb20230</i> in pMK2017 destination vector | This work |
| pHY2   | <i>SMb20232</i> in pMK2016 destination vector | This work |
| pHY8   | <i>SMb20661</i> in pMK2017 destination vector | This work |
| pHY12  | <i>SMb21338</i> in pMK2017 destination vector | This work |
| pHY16  | <i>SMa1239</i> in pMK2017 destination vector  | This work |
| pHY20  | <i>SMa1509</i> in pMK2017 destination vector  | This work |
| pHY24  | <i>SMb21336</i> in pMK2016 destination vector | This work |
| pHY28  | <i>SMa1233</i> in pMK2016 destination vector  | This work |
| pHY32  | <i>SMb20659</i> in pMK2016 destination vector | This work |
| pHY40  | <i>SMa1505</i> in pMK2016 destination vector  | This work |
| pHY64  | <i>SMc03064</i> in pMK2017 destination vector | This work |
| pHY66  | <i>SMc04138</i> in pMK2017 destination vector | This work |
| pHY72  | <i>SMb20384</i> in pMK2017 destination vector | This work |
| pHY74  | <i>SMa2127</i> in pMK2017 destination vector  | This work |
| pHY76  | <i>SMa1037</i> in pMK2016 destination vector  | This work |
| pHY88  | <i>SMc03062</i> in pMK2016 destination vector | This work |
| pHY90  | <i>SMc04136</i> in pMK2016 destination vector | This work |
| pHY96  | <i>SMb20382</i> in pMK2016 destination vector | This work |
| pHY98  | <i>SMa2123</i> in pMK2016 destination vector  | This work |

---

\* Antibiotic abbreviations: Cm, chloramphenicol; Tc, tetracycline; Kan, kanamycin; Sm, streptomycin; Spc, spectinomycin; Rif, rifampin; Suc, sucrose.

**Table S3. Primers used in this work**

| No. | Primer name  | Sequence (5'→ 3')       |
|-----|--------------|-------------------------|
| 1   | sma0943 Fwd  | ACCCGCATACAGGAAGTGTC    |
| 2   | sma0943 Rvs  | AGGATGAACTTCCCGAGGAT    |
| 3   | sma1038 Fwd  | CCCTCCTCACATACAACGCG    |
| 4   | sma1038 Rvs  | TGGGTGGCCTGGGCTTTCTT    |
| 5   | sma1182 Fwd  | GCGCCAAGGAGTGTCCGG      |
| 6   | sma1182 Rvs  | CTTTGCCGTTGCCCATGACA    |
| 7   | sma1236 Fwd  | GGCGTGTCTCTCCGCCAG      |
| 8   | sma1236 Rvs  | GCTGGTCGGGATAGGCGC      |
| 9   | sma1507 Fwd  | AGGTCTTCCGGAGCTGAC      |
| 10  | sma1507 Rvs  | ATTGTGCGCTTCGATCCGTC    |
| 11  | sma1641 Fwd  | GGCATCTGAAAAGCGTCATT    |
| 12  | sma1641 Rvs  | GCCATCCAGCTGAGGAGTAG    |
| 13  | sma1819 Fwd  | GAATGACGATGAAGATGTATCTC |
| 14  | sma1819 Rvs  | GAAGGTCTTCGCCGTCCTC     |
| 15  | sma2021 Fwd  | CAACCAGAGGCTGAGGTTTC    |
| 16  | sma2021 Rvs  | TTGCGTCGGCTTATAGGTTT    |
| 17  | sma2125 Fwd  | GAAGATCCTGGAAAAGCGTGC   |
| 18  | sma2125 Rvs  | AGGTTTCAGGGCCAGACCGG    |
| 19  | sma2129 Fwd  | CTCTGCAGCCTATCGTCGATG   |
| 20  | sma 2129 Rvs | GCGCGGTAGTATCCGTAAGAC   |
| 21  | sma2157 Fwd  | CATTTGGACGCCCCGTCGC     |
| 22  | sma2157 Rvs  | GCGTTCCCAGCCGCTTCCC     |
| 23  | smb20231 Fwd | ATCGCGCGTGTCCGCAAC      |
| 24  | smb20231 Rvs | CAGCGGGTTCGTTCCACATG    |
| 25  | smb20342 Fwd | CGGTCCCTGTCAAACCTTCAT   |
| 26  | smb20342 Rvs | ACCCGTTCTTCTGGACAAGC    |
| 27  | smb20383 Fwd | ATGTCGTCGGGATCAGCTT     |
| 28  | smb20383 Rvs | ATGGGACCTATTGCCCTAC     |
| 29  | smb20404 Fwd | GGAGATCACCACCATCGAG     |
| 30  | smb20404 Rvs | AGGCCTCGCTGATCCTTT      |
| 31  | smb20660 Fwd | GACCGGCTACGAGACGCA      |
| 32  | smb20660 Rvs | GATCAGAAAGACGGCTGCC     |
| 33  | smb20671 Fwd | GTGCTCTATGTGGCGCAGTA    |
| 34  | smb20671 Rvs | CATGTTGCTGACGCTGAAAT    |
| 35  | smb21337 Fwd | CTCGAGGAACGCATCCGG      |
| 36  | smb21337 Rvs | CTGAGACAGAGCCGGGTA      |
| 37  | smb21380 Fwd | ACGCTGCACATGTCGTCGG     |
| 38  | smb21380 Rvs | TGGCGAGCGCTCGAAGAATG    |
| 39  | smb21558 Fwd | GCTTTTGCCGCTAGCTTTC     |
| 40  | smb21558 Rvs | AATCTGCGCACATCCTGATT    |
| 41  | smc00187 Fwd | CTATAACCCGTCAAGTCCTTG   |
| 42  | smc00187 Rvs | CGGTGAGGATCTGCACGATC    |
| 43  | smc00817 Fwd | CTATCGCCAGCCGCTGTTC     |
| 44  | smc00817 Rvs | CGGCGCCACGTCGATGGC      |
| 45  | smc01632 Fwd | CCGGTCATGGTGGCGCTGC     |
| 46  | smc01632 Rvs | CAACGCCGCCGTAACCAGG     |
| 47  | smc01724 Fwd | TGGTGACGATCCGCCGGT      |
| 48  | smc01724 Rvs | ACGGCATCGACGACGACTT     |
| 49  | smc02021 Fwd | CCTCTGGGCCACACCATG      |
| 50  | smc02021 Rvs | ATGTGGACCTGTTTGCCATT    |
| 51  | smc04049 Fwd | CAAGCTTCCTGCTTGTAGCC    |
| 52  | smc04049 Rvs | GGGTTTGAGTTCGTCGAGAT    |

|    |               |                               |
|----|---------------|-------------------------------|
| 53 | smc03063 Fwd  | ACGGCGCCAATGGCTGGC            |
| 54 | smc03063 Rvs  | GCGCCGAGCCCTGCAATG            |
| 55 | smc04137 Fwd  | GGCGTCCAAGTTCCGTCAGT          |
| 56 | smc04137 Rvs  | TCCTCTGCCGTCGCGATGC           |
| 57 | smc4167 Fwd   | GTCGAGCGTGCGCTCGAAG           |
| 58 | smc4167 Rvs   | CGCGGCCTTGCCGAAGTTG           |
| 59 | smc04218 Fwd  | CAGCGGCGAGATACTGCTCG          |
| 60 | smc04218 Rvs  | GCACTTGCGGCCCCGGTCA           |
| 61 | orf conf. Fwd | GGGGACAAGTTTGTACAAAAAACCAGGCT |
| 62 | orf conf. Rvs | GGGGACCACTTTGTACAAGAAAGCTGGGT |

---

### Literature Cited

1. **Finan, T. M., B. Kunkel, G. F. De Vos, and E. R. Signer.** 1986. Second symbiotic megaplasmid in *Rhizobium meliloti* carrying exopolysaccharide and thiamine synthesis genes. *J Bacteriol* **167**:66-72.
2. **Hanahan, D.** 1983. Studies on transformation of *Escherichia coli* with plasmids. *J Mol Biol* **166**:557-570.
3. **House, B. L., M. W. Mortimer, and M. L. Kahn.** 2004. New recombination methods for *Sinorhizobium meliloti* genetics. *Appl Environ Microbiol* **70**:2806-15.
4. **Meade, H. M., S. R. Long, G. B. Ruvkin, S. E. Brown, and F. M. R. Ausubel.** 1982. Physical and genetic characterization of symbiotic and auxotrophic mutants of *Rhizobium meliloti* induced by transposon Tn5 mutagenesis. *J. Bacteriol.* **149**:114-122.
5. **Simon, R., U. Priefer, and A. Pühler.** 1983. A broad host range mobilization system for *in vivo* engineering: Transposon mutagenesis in gram-negative bacteria. *Bio/Techniques* **1**:784-791.
